# Supplementary material for: ‘Nanoreactors’ for photocatalytic H2 evolution in oil–water biphase systems
Source: Royal Society of Chemistry journal article supplement (doi:10.1039/c0cp01396j), 2010-01-01
Supplement: c0cp01396j.pdf [file c0cp01396j.pdf]

Electronic Supplementary Information

**'Nanoreactors' for photocatalytic H<sub>2</sub> evolution in oil-water biphasic systems**

*Jiehua Liu,<sup>\*a</sup> Xiangfeng Wei,<sup>a</sup> Yaolun Yu,<sup>c</sup> Xin Wang,<sup>c</sup> Wei-Qiao Deng<sup>\*b</sup> and Xue-Wei Liu<sup>\*a</sup>*

<sup>a</sup> School of Physical & Mathematical Sciences, Nanyang Technological University, 637371 Singapore  
E-mail: [xuewei@ntu.edu.sg](mailto:xuewei@ntu.edu.sg) and [liuj0042@ntu.edu.sg](mailto:liuj0042@ntu.edu.sg);

<sup>b</sup> Dalian Institute of Chemical Physics, Chinese Academy of Sciences, Dalian 116023 China; E-mail:  
[dengwq@dicp.ac.cn](mailto:dengwq@dicp.ac.cn);

<sup>c</sup> School of Chemical and Biomedical Engineering, Nanyang Technological University, 639798  
Singapore

.

## **Experimental Section**

### ***In situ Preparation of CdS and Pt@CdS nanosheets***

Nanoporous CdS nanosheets were synthesized by a facile method. In a typical route, Cd(OAc)<sub>2</sub>·2H<sub>2</sub>O (2.00 mmol) was first added into deionized water (10 mL) to get a clear solution; then milky emulsion was formed by the addition of N, N-Dimethylethanolamine (4 mL); after 0.2 mol L<sup>-1</sup> Na<sub>2</sub>S solution (10 mL) was added and dispersed with aid of supersonic, the emulsion was placed in an oven for 12 hours at 70 °C. The CdS nanosheets were formed in solution. To load Pt nanoparticles, H<sub>2</sub>PtCl<sub>6</sub> solution and 1 mL methanol are added into CdS nanosheets aqueous solution and then irradiated it for 5 hours under simulated sunlight with strong stirring and. Finally, 68 g suspension of Pt@CdS catalyst (5.0 mg catalyst in 1 g suspension) was prepared to be directly used for photocatalytic reaction.

### ***Characterizations***

FESEM images, transmission electron micrographs (TEMs) and HRTEM were obtained with JEOL JSM 6700F, JEOL JEM-1400 and JEOL JEM-2100 respectively. Photoluminescence spectra were recorded by Steady-state Fluorescence spectrofluorometer. UV-Vis absorption spectra were measured by a JASCO V-670 spectrophotometer. H<sub>2</sub> and Organic substances were analyzed with GC2014 and Agilent 6879N, respectively. N<sub>2</sub> adsorption-desorption isotherms were conducted at 77 K on a Micromeritics Tristar 3000 analyzer. The BET surface areas and pore-size distribution curves were concluded using adsorption data.

### ***Photocatalytic reaction***

The photocatalytic reactions were carried out in a 600 mL cylindrical glass reactor with quartz top-window connected to a closed gas circulation. In single systems, 0.010 g of 1% Pt@CdS was suspended in 100 mL of aqueous solution containing 0.1 M Na<sub>2</sub>S and 0.02 M Na<sub>2</sub>SO<sub>3</sub> solution as the sacrificing agent. In oil/H<sub>2</sub>O systems, 0.010 g of 1% Pt@CdS was suspended in 10-30 mL oil and 100 mL of aqueous solution containing 0.1 M Na<sub>2</sub>S and 0.02 M Na<sub>2</sub>SO<sub>3</sub> solution as the sacrificing agent. The systems are conducted under irradiation by simulated sunlight. The amount of H<sub>2</sub> produced was analyzed using a gas chromatography (GC2014). The average rates of H<sub>2</sub> evolution were recoded in the first 3 h.

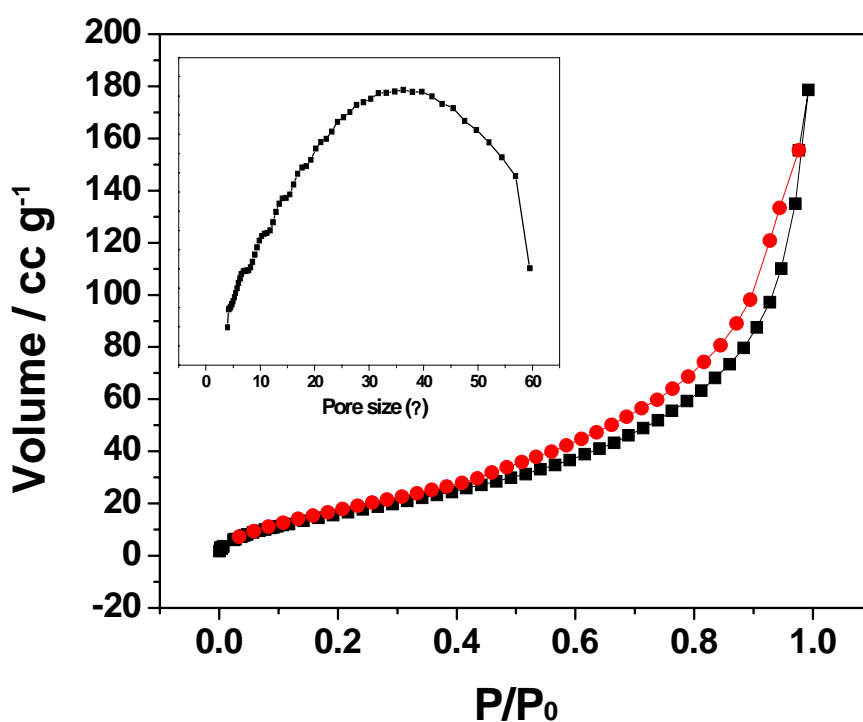

Figure S1: N<sub>2</sub> adsorption–desorption isotherms and nanopore size distribution of catalyst nanosheets.

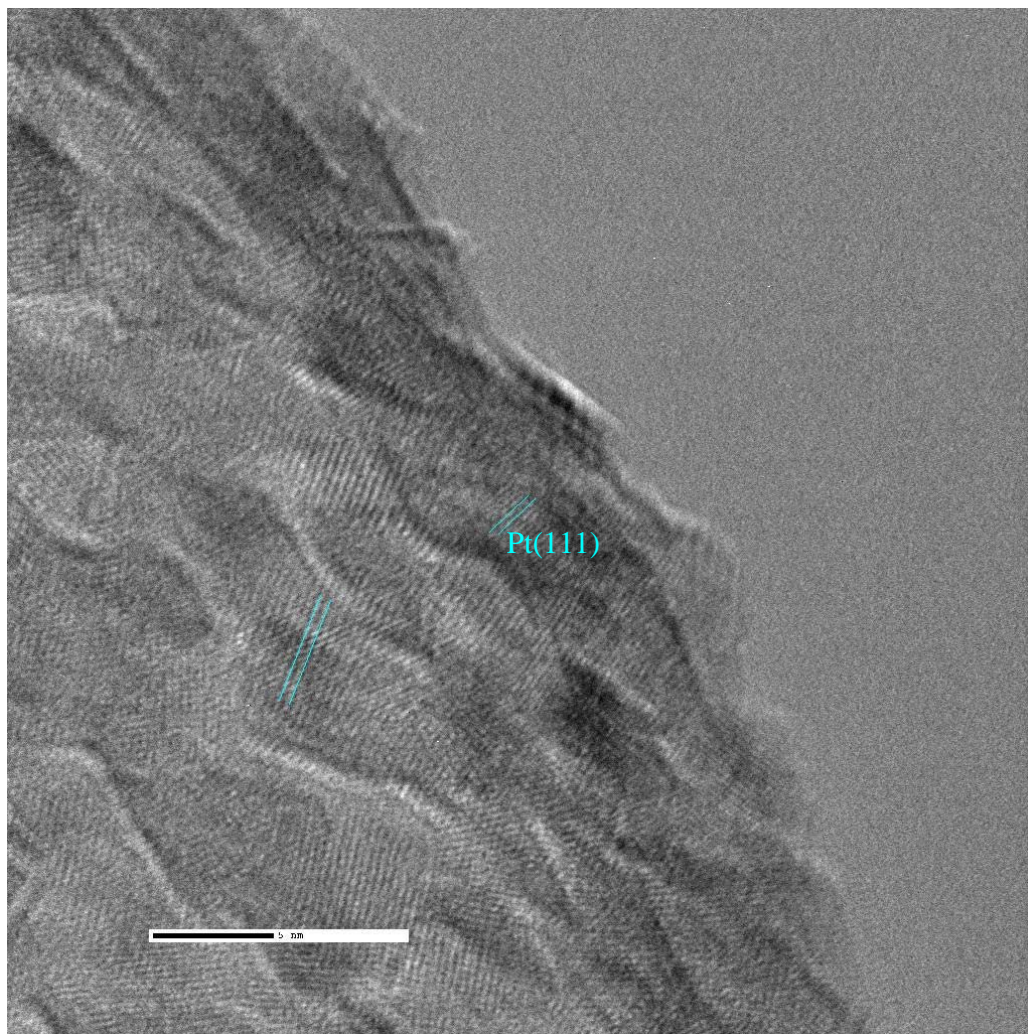

Figure S2: HRTEM image and EDX spectra of 1.0% Pt@CdS catalyst.

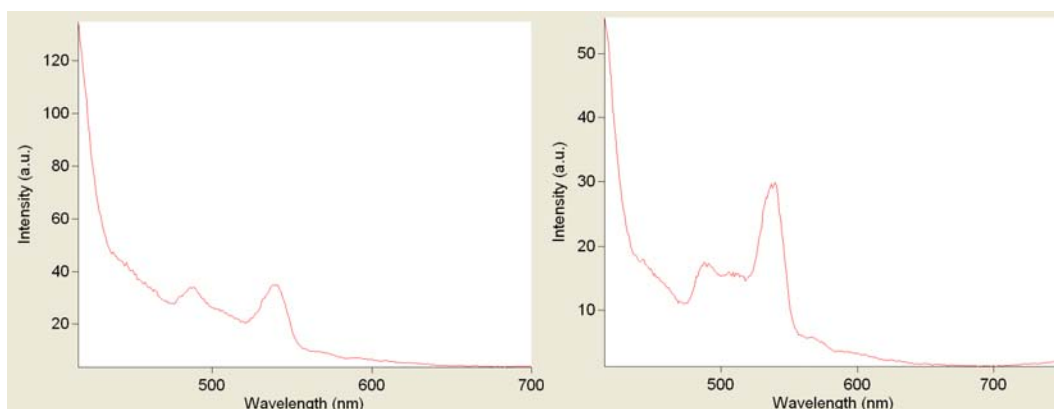

Figure S3: Fluorescence spectra of CdS and Pt@CdS nanocatalysts in  $\text{H}_2\text{O}$  solution with 397 nm as the maximum excitation wavelength at room temperature.

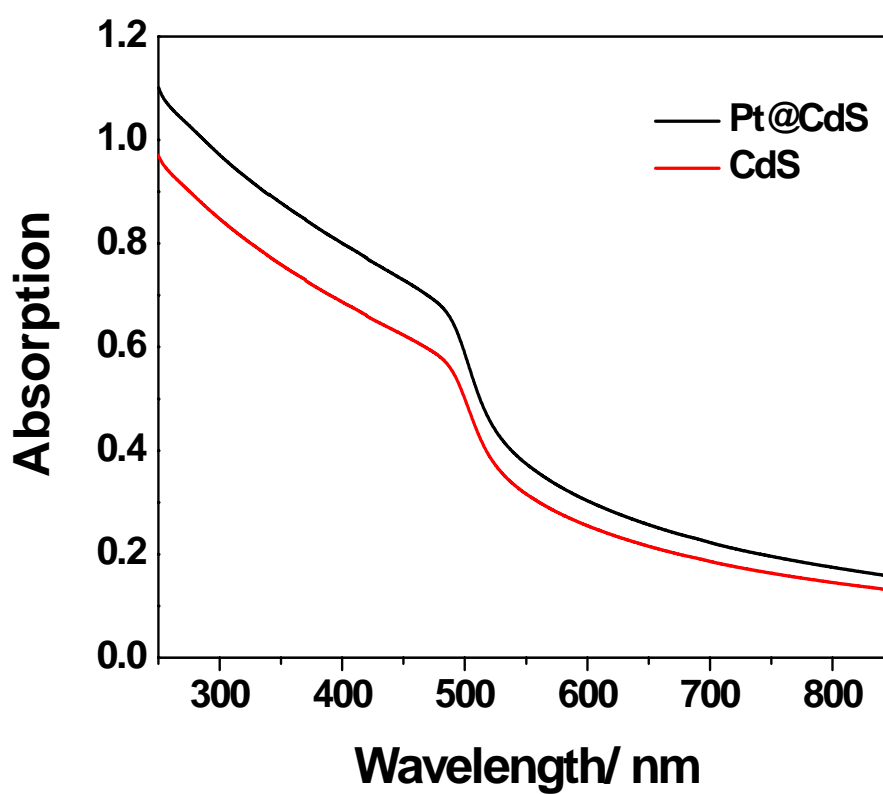

Figure S4: UV-Visible spectra of 1.0% Pt@CdS in  $\text{H}_2\text{O}$  solution.

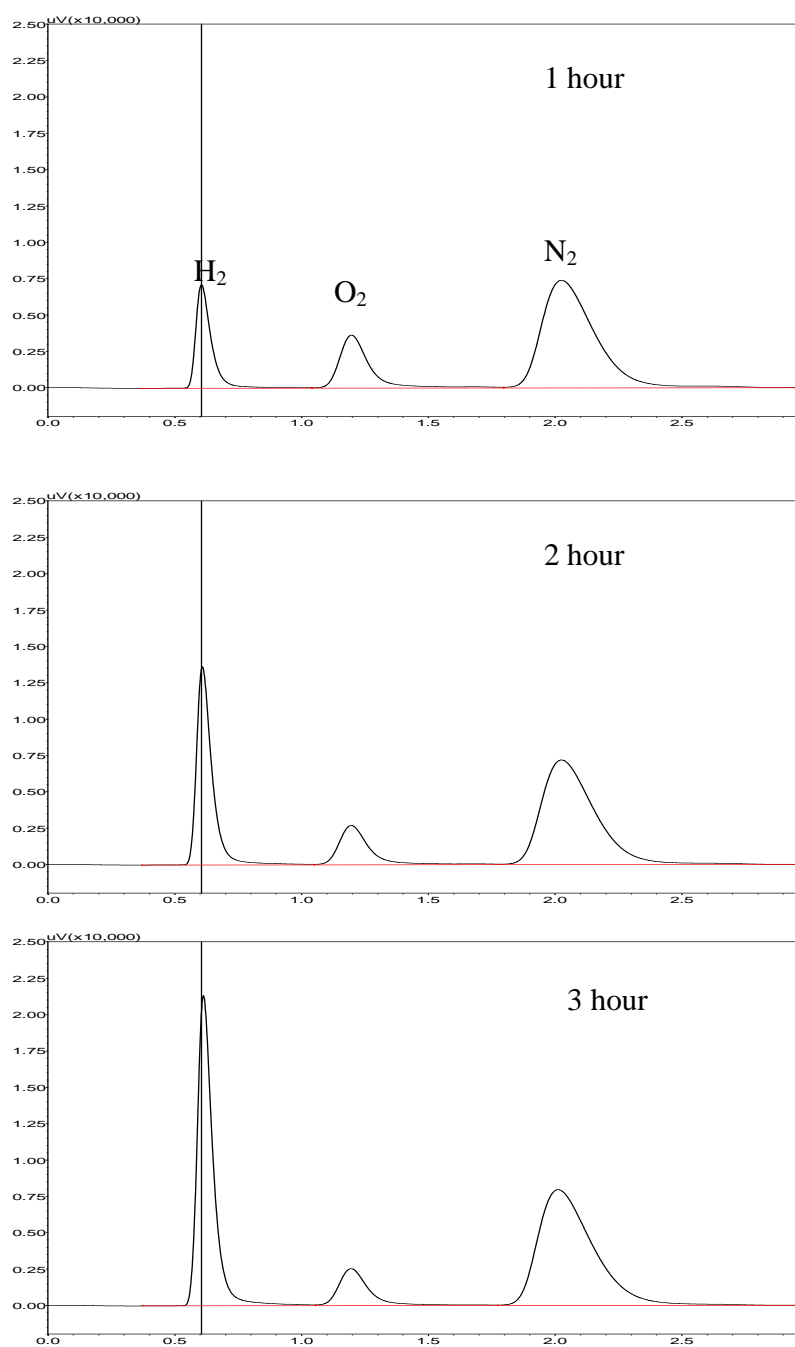

Figure S5: GC curves of the amount of  $H_2$  evolution in hexane/water biphasic system in different time.
